# Supplementary material for: Ligand cleavage enables formation of 1,2-ethanedithiol capped colloidal quantum dot solids
Source: Royal Society of Chemistry journal article supplement (doi:10.1039/c9nr02708d), 2019-01-01

**Supporting Information for Multi-step Ligand Exchange On P-type Quantum Dots  
Facilitates High-performance Solar Cells**

James Z. Fan, Andrew D. La Croix, Zhenyu Yang, Emma Howard, Rafael Quintero-Bermudez, Larissa Levina, Nicole M. Jenkinson, Nathan J. Spear, Yiyi Li, Olivier Ouellette, Zheng-Hong Lu, Edward H. Sargent, and Janet E. Macdonald

# FMT $^1\text{H}$ NMR

FMT

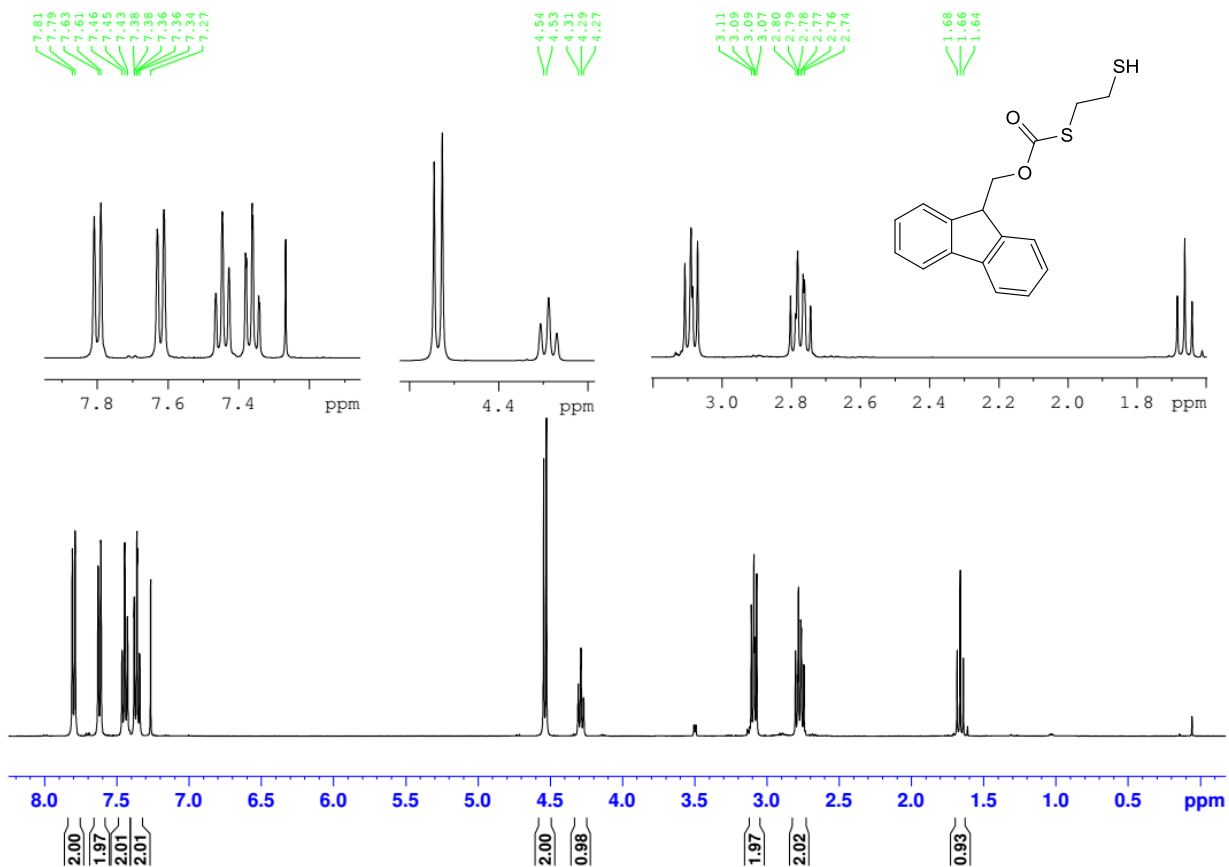

Figure S1:  $^1\text{H}$  NMR of Pure FMT.

# FMT $^{13}\text{C}$ NMR

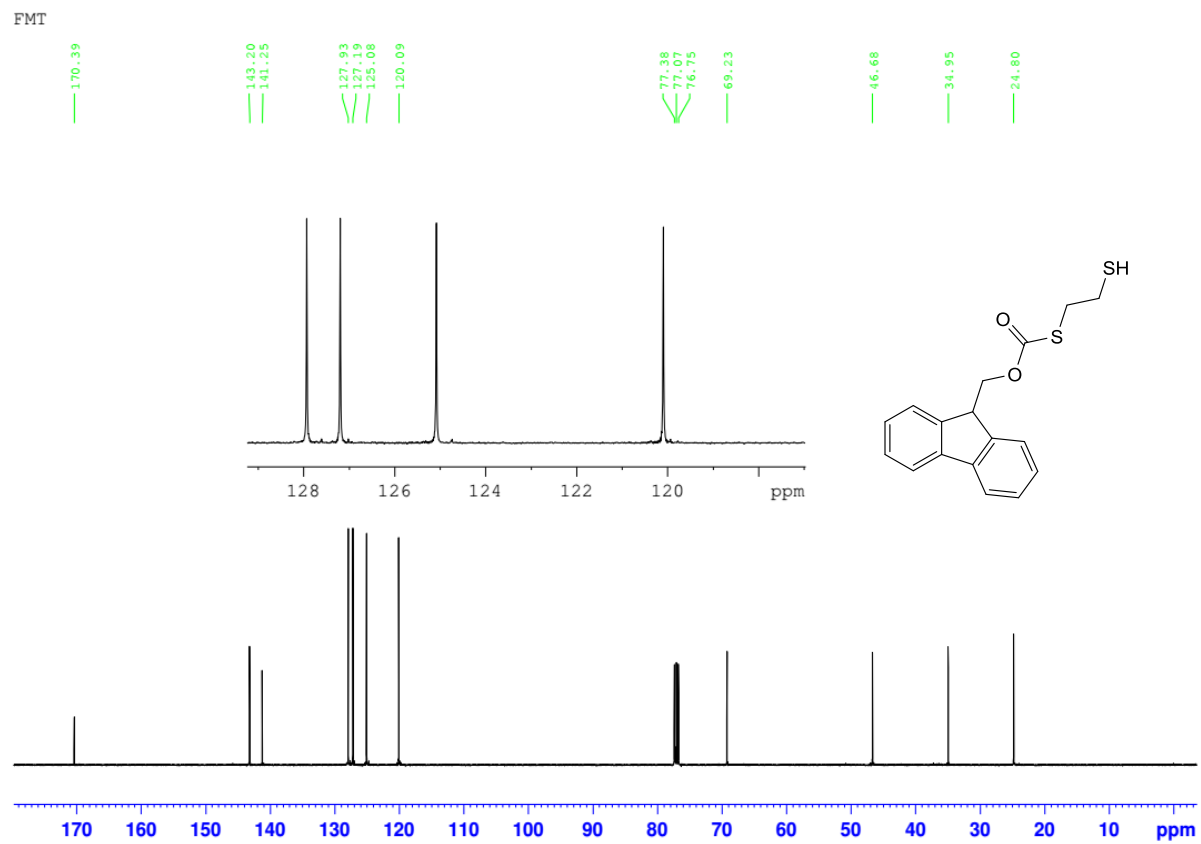

Figure S2:  $^{13}\text{C}$  NMR for pure FMT.

# $^1\text{H}$ NMR of OA-PbS

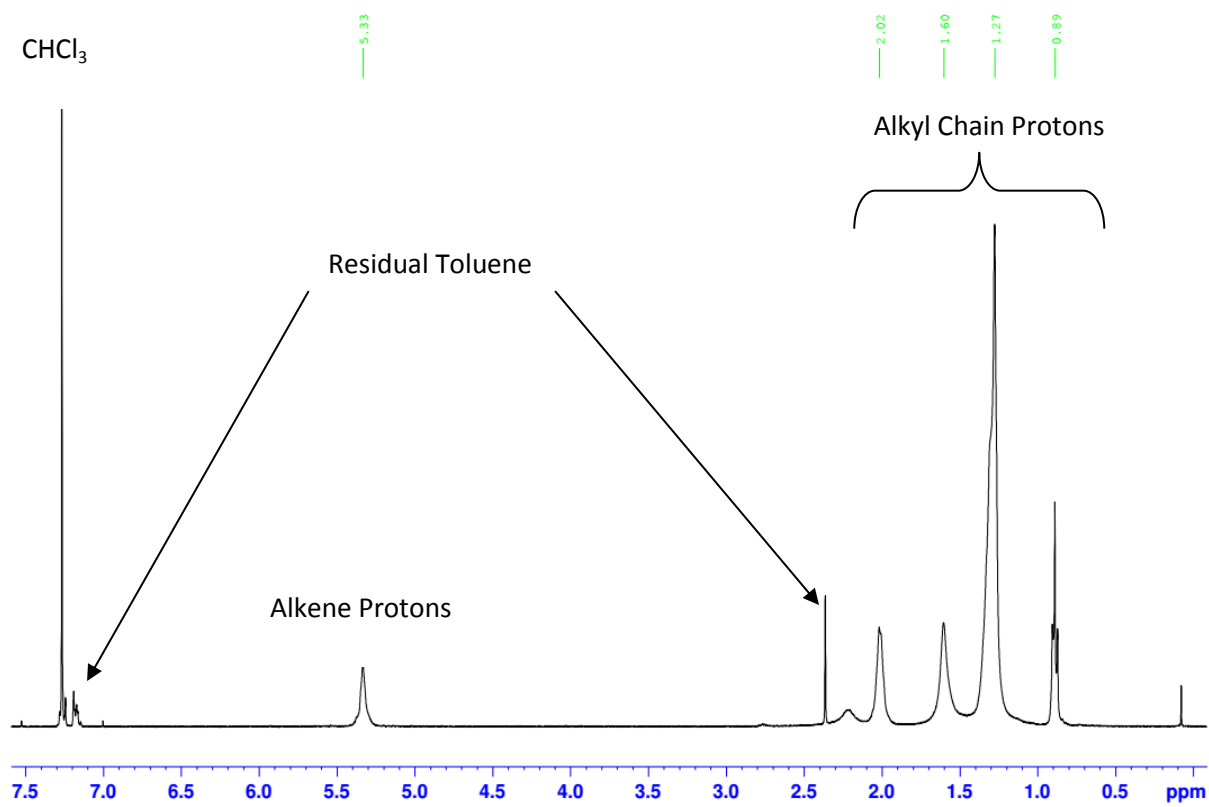

**Figure S3:**  $^1\text{H}$  NMR of OA-PbS. Pertinent signals are marked.

*<sup>1</sup>H NMR of FMT-PbS*

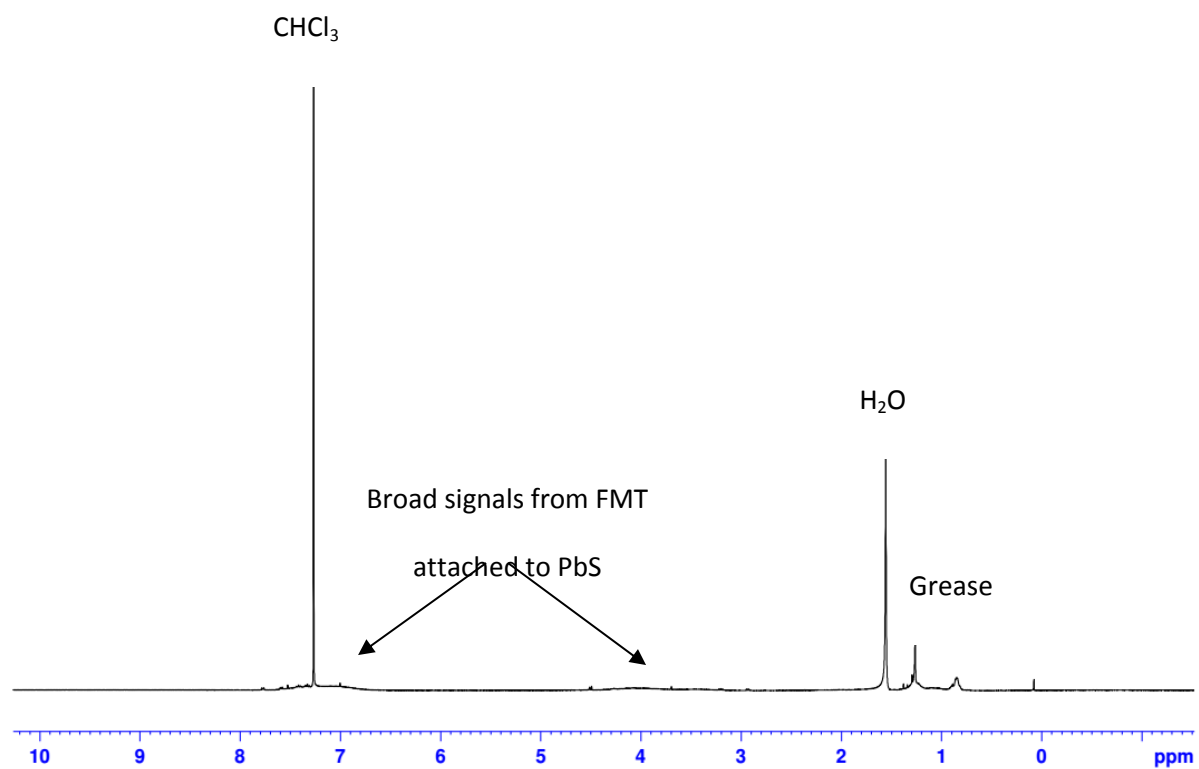

**Figure S4:** <sup>1</sup>H NMR of FMT-PbS. Pertinent peaks are marked.

*XPS data*

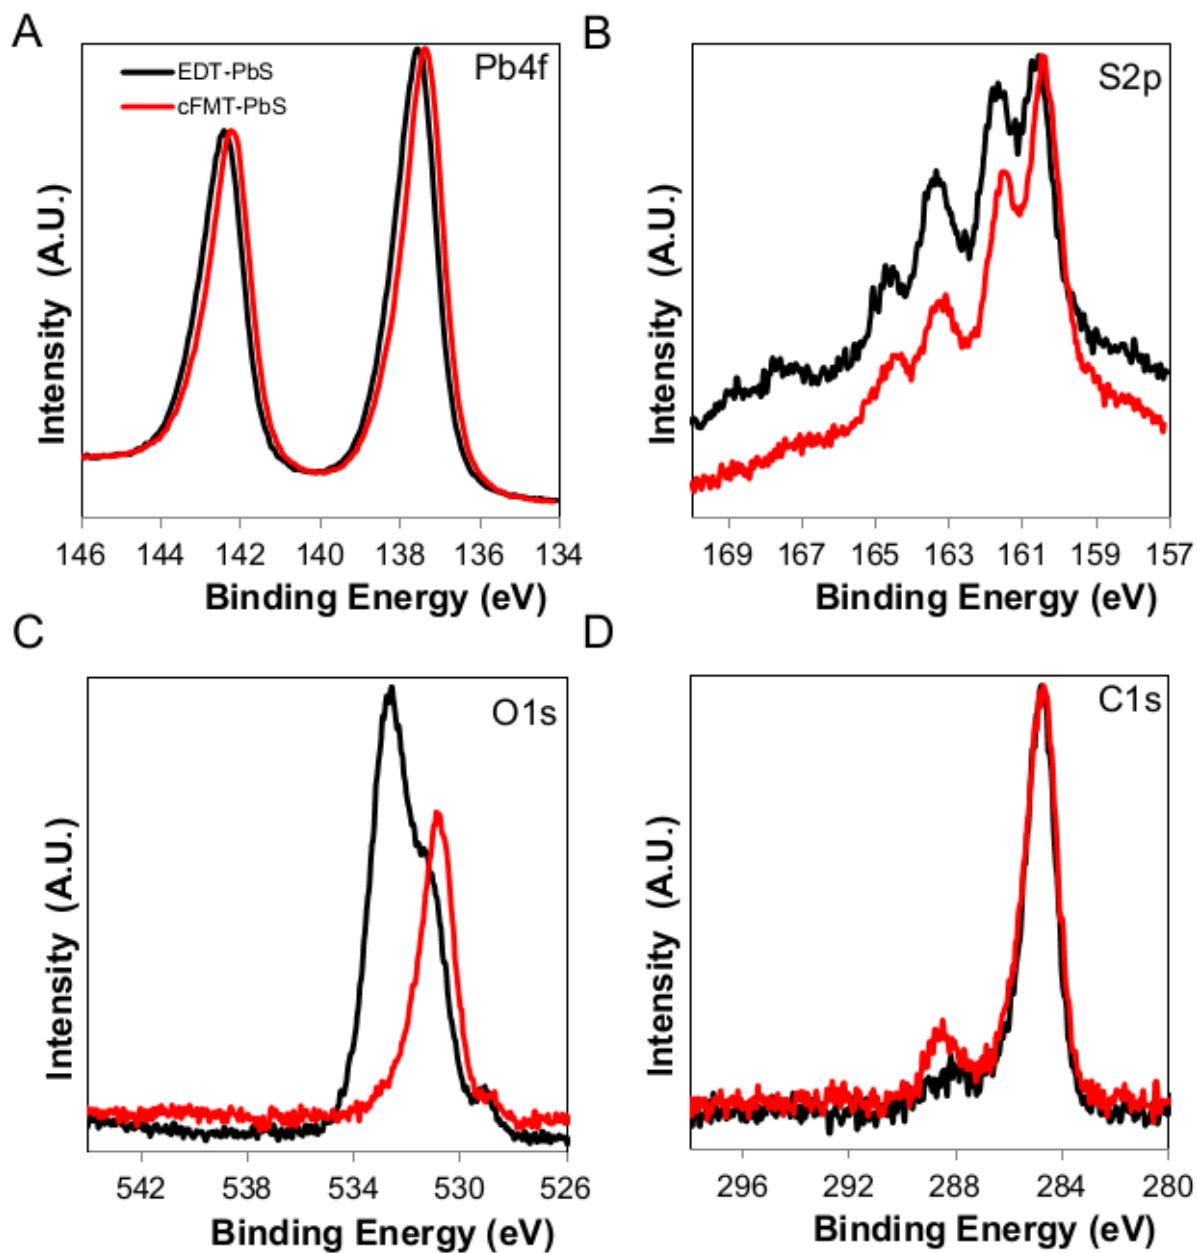

**Figure S5:** XPS spectra comparing a FMT- cleaved Film to an direct soak EDT-PbS Film. XPS spectra are shown for a) Pb 4f, b) S 2p, c)O 1s, d) C 1s. The C1s spectra for FMT contains a small signal at 289 eV which is likely due to residual ethyl acetate from the cleavage procedure.

### *UPS-EDT-PbS*

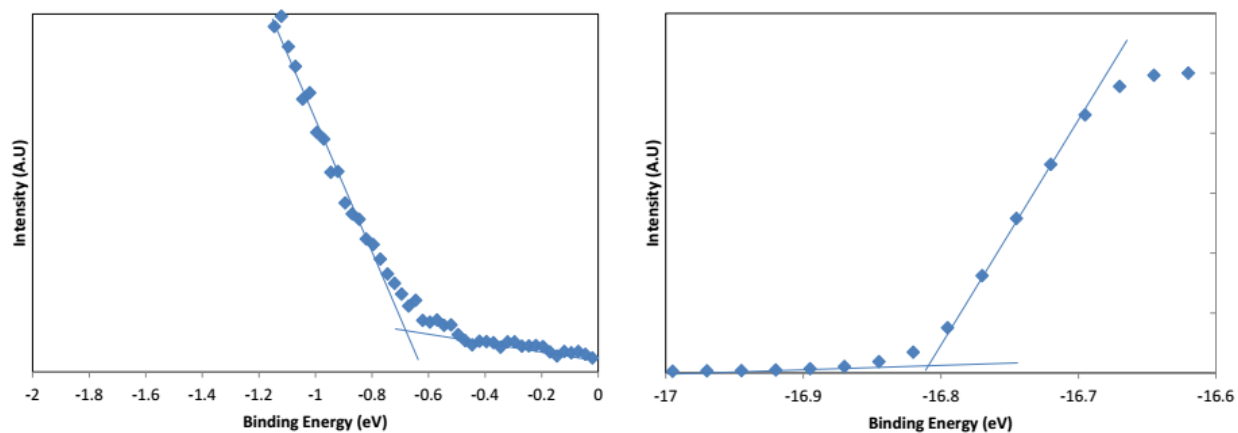

### *UPS-cFMT-PbS*

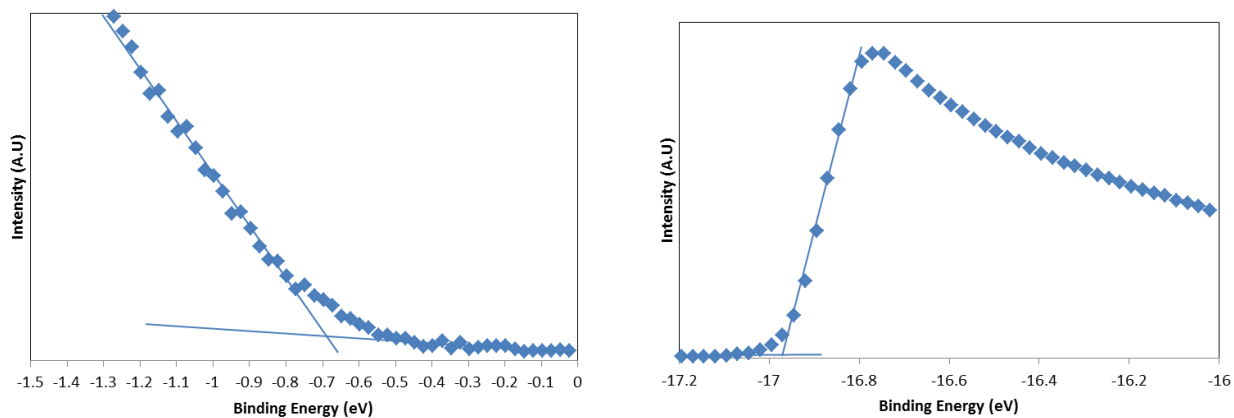

**Figure S6:** Ultraviolet Photoelectron Spectra comparing a directly soaked EDT film and a FMT-Cleaved EDT-PbS Film. A) Zoom in spectra of the high binding energies for a directly soaked EDT film. B) Zoom in spectra of the low binding energies for a directly soaked EDT film. C) Zoom in spectra of the high binding energies for a FMT cleaved EDT-PbS Film. D) Zoom in Spectra of the low binding energies for a FMT cleaved EDT-PbS film.

The values for the energy levels are as follows:

EDT- PbS: CB: 3.7 EF: 4.41 VB: 5.08

cFMT-PbS: CB: 3.5 Ef: 4.27 VB: 4.94

## JV Sweeps

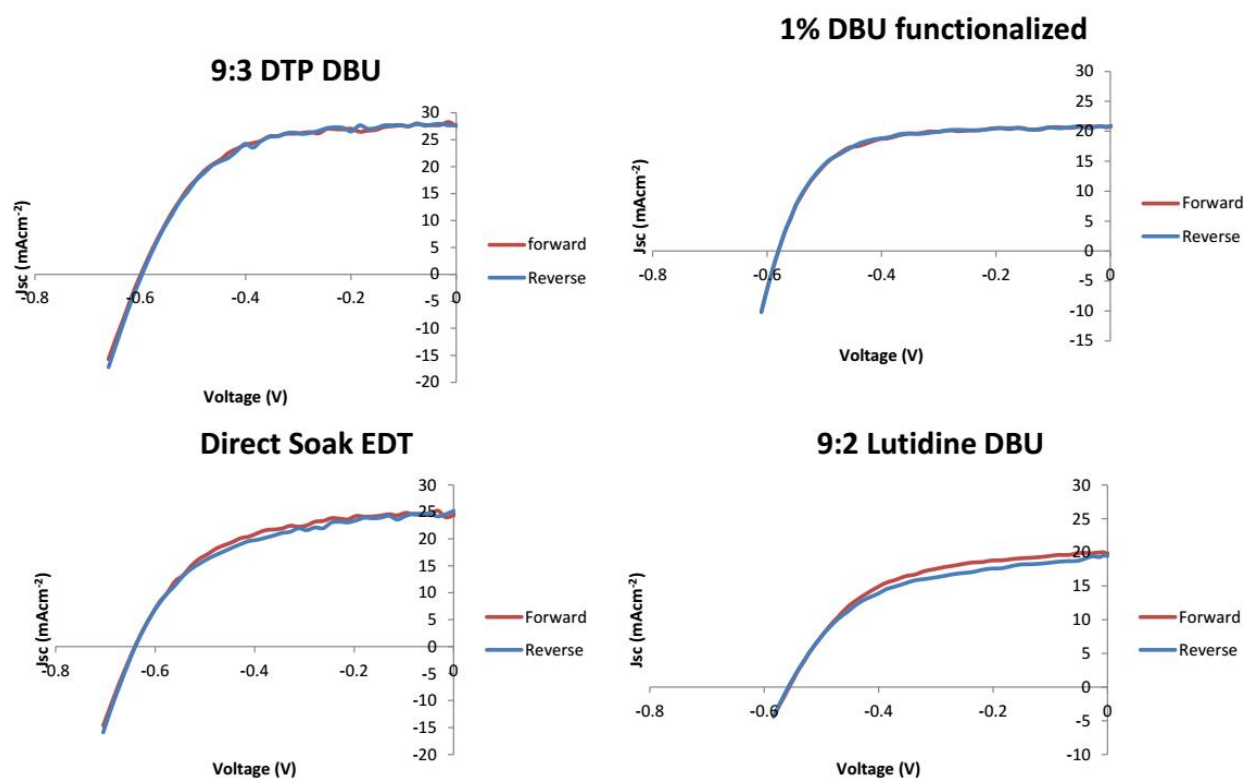

Figure S7: Full device characteristics for those tabulated in Table S5



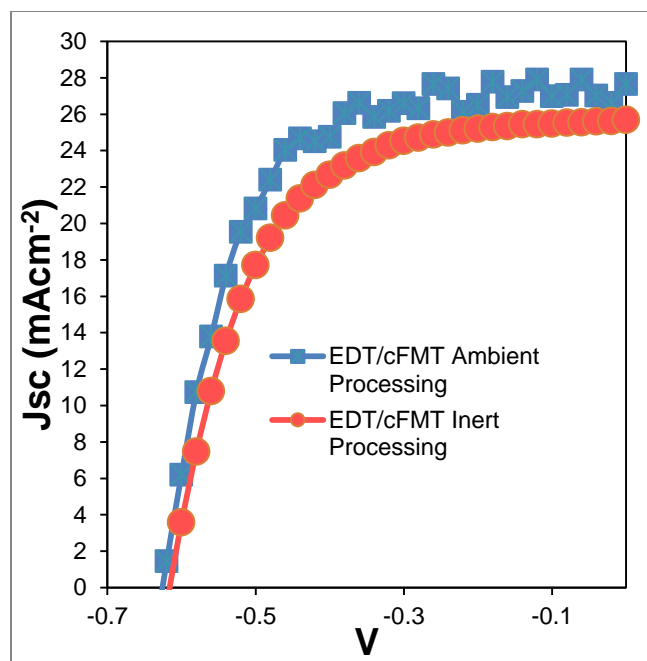

Figure S8: EDT/cFMT fabricated both in inert and ambient conditions.

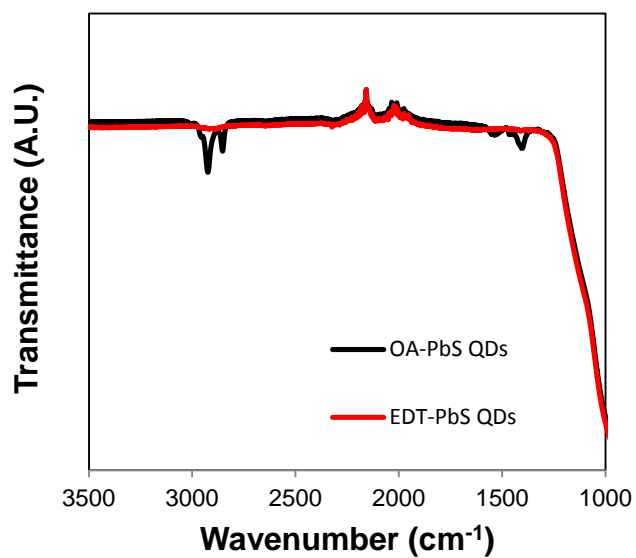

Figure S9: FTIR of EDT-PbS Films on glass substrates fabricated inside inert conditions. The disappearance of the -OH peak is seen.

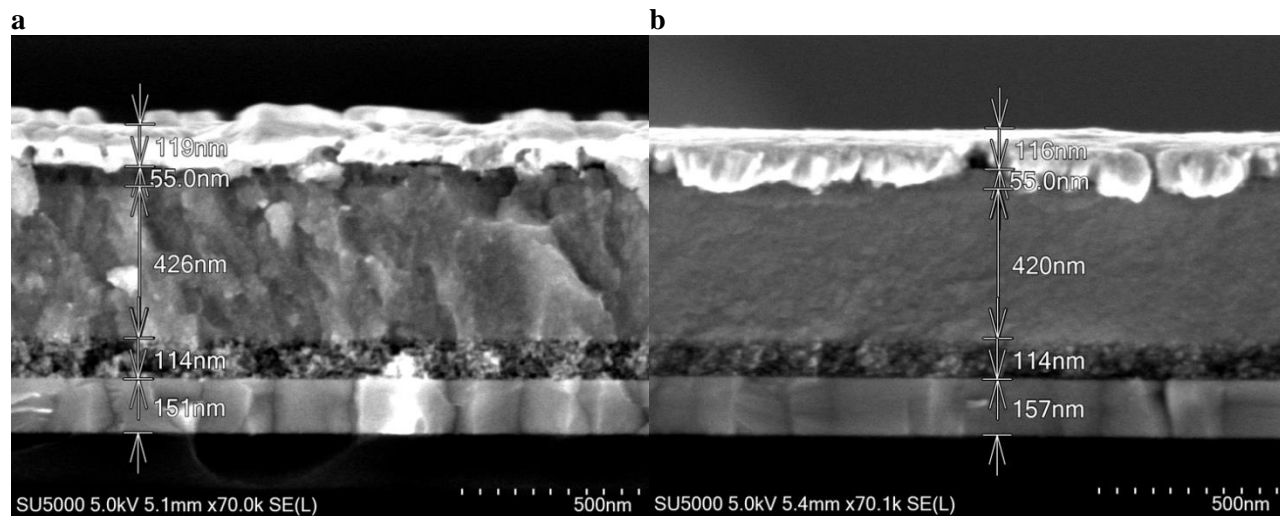

**Figure S10:** Cross sectional scanning electron microscope (SEM) images of both the EDT/EDT based device (a) and EDT/cFMT device (b) The layers are labelled as the following from top to bottom: Au, hole transport layer (HTL), PbS active layer, ZnO electron transport layer (ETL), indium doped tin oxide (ITO).

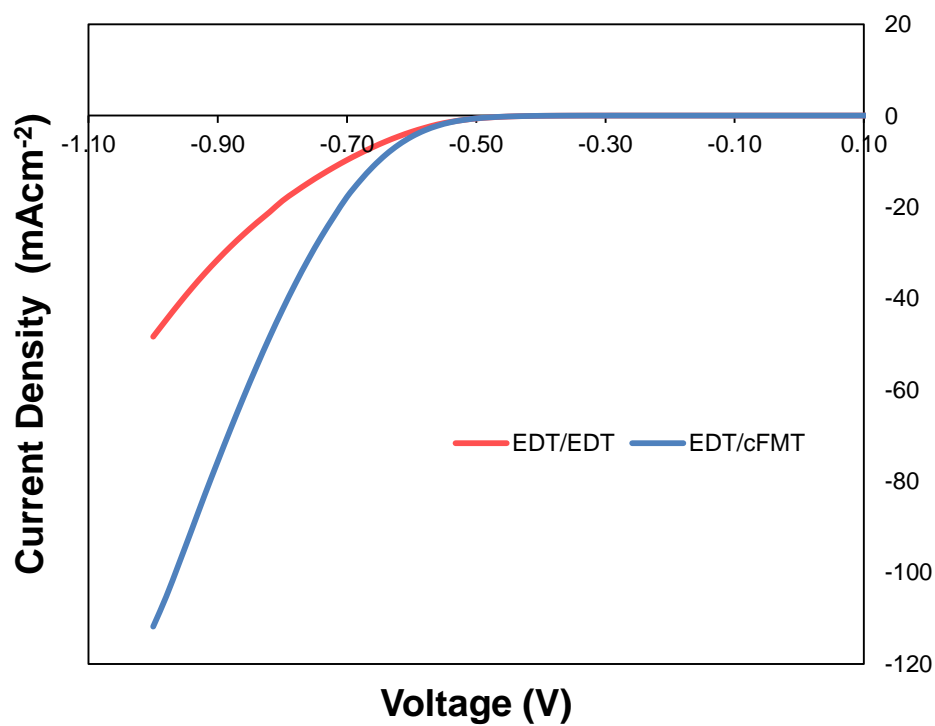

**Figure S11:** Dark J-V sweeps of an EDT/cFMT device and EDT/EDT device. JV sweeps were taken from devices aged after 18 days of storage in air. The  $R_{\text{Series}}$  of the EDT/cFMT device is  $2.9 \Omega \text{ cm}^2$  and the  $R_{\text{Series}}$  of the EDT/EDT device is  $6.4 \Omega \text{ cm}^2$ .

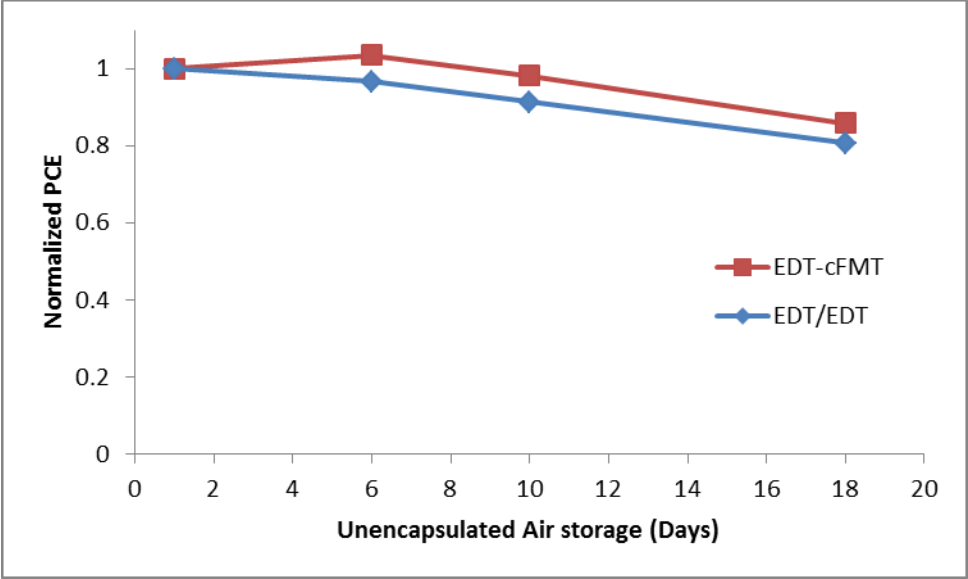

Figure S12: Stability tracking of an EDT/EDT device and a EDT/cFMT device.

| Molecule | HOMO (eV) | LUMO(eV) | Bandgap (eV) |
|----------|-----------|----------|--------------|
| EDT      | -6.73     | -0.17    | 6.56         |
| FMT      | -6.22     | -1.31    | 4.92         |

**Table S1:** HOMO, LUMO, and bandgap of EDT and FMT calculated from DFT.

| Figure of Merit            | Inert fabrication | Ambient Fabrication |
|----------------------------|-------------------|---------------------|
| Voc (V)                    | 0.62±0.01         | 0.62±0.01           |
| Jsc (mA cm <sup>-2</sup> ) | 24.39             | 25.68               |
| FF (%)                     | 42.8±1            | 59.4±1              |
| PCE (%)                    | 6.51              | 9.4                 |

**Table S2:** Device figure of merit for an EDT/cFMT device fabricated in inert and ambient conditions.

|                         | EDT/cFMT  |           |
|-------------------------|-----------|-----------|
| Day                     | 1         | 18        |
| Voc/V                   | 0.63±0.01 | 0.61±0.01 |
| Jsc/mA cm <sup>-2</sup> | 28.44     | 27.20     |
| FF/%                    | 61±1%     | 56±1%     |
| PCE/%                   | 10.97     | 9.15      |

**Table S3:** Device figure of merit for stability of an EDT/cFMT device

|                         | EDT/EDT   |           |
|-------------------------|-----------|-----------|
| Day                     | 1         | 18        |
| Voc/V                   | 0.63±0.01 | 0.61±0.01 |
| Jsc/mA cm <sup>-2</sup> | 27.65     | 27.69     |
| FF/%                    | 64±1%     | 53±1%     |
| PCE/%                   | 11.05     | 8.88      |

**Table S4:** Device figure of merit for stability of an EDT/EDT device

| Functionalization solvent                             | $V_{oc}$ (V) | $J_{sc}$<br>(mA/cm <sup>2</sup> ) | $FF_{forward}$<br>(%) | $FF_{reverse}$<br>(%) | PCE<br>(%) |
|-------------------------------------------------------|--------------|-----------------------------------|-----------------------|-----------------------|------------|
| DBU only                                              | 0.58±0.01    | 20.77                             | 66.02±1%              | 65.30±1%              | 7.80       |
| 9:2 v/v 2,6-lutidine: DBU                             | 0.56±0.01    | 20.58                             | 54.07±1%              | 51.17±1%              | 5.88       |
| 9:3 v/v DTP:DBU                                       | 0.60±0.01    | 26.96                             | 59.72±1%              | 58.53±1%              | 9.56       |
| EDT-PbS control                                       | 0.63±0.01    | 27.65                             | 63.9±1%               | 63.4±1%               | 11.01      |
| Graded: 1 Layer EDT-PbS + 1 layer 30:1 v/v DMPpy: DBU | 0.66±0.01    | 27.41                             | 60.65±1%              | 61.14±1%              | 11.01      |

**Table S5:** Figure of Merit for Solar cells

| Hours | Normalized PCE |          |
|-------|----------------|----------|
|       | EDT-EDT        | EDT-cFMT |
| 24±1  | 1              | 1        |
| 43±1  | 0.81           | 0.86     |

**Table S6:** Normalized PCE of EDT/EDT and EDT/cFMT devices stored over a period of 18 days.

## Structures of Compounds Used

### Reactants

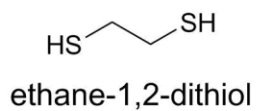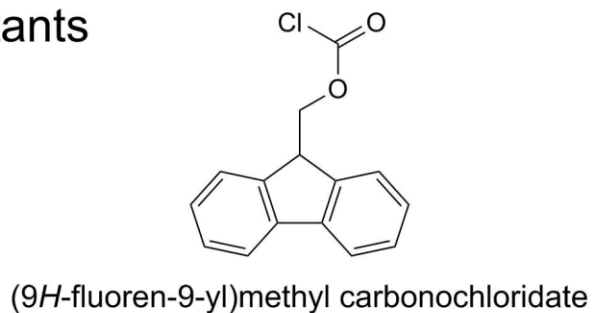

### Ligand

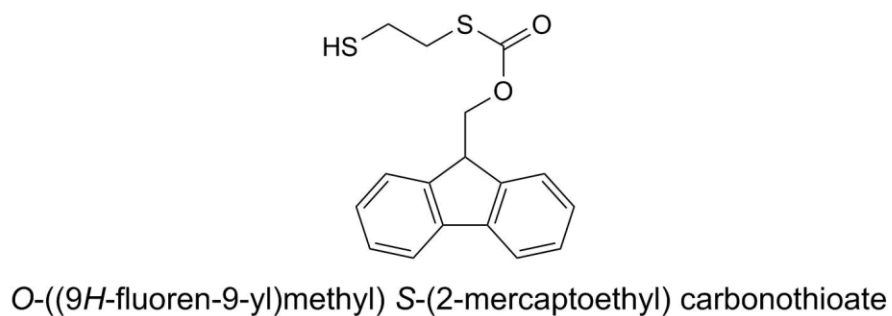

### Bases

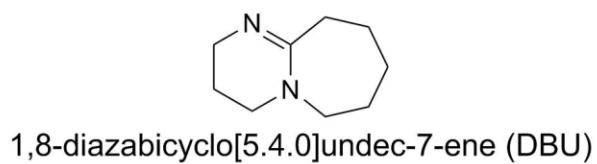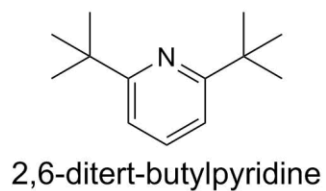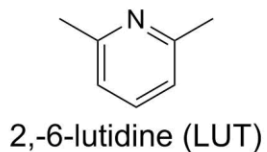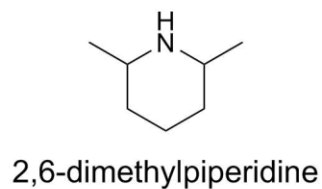

Supplement: c9nr02708d1.pdf [file c9nr02708d1.pdf]
